# Supplementary material for: Molecular defect-containing bilayer graphene exhibiting brightened luminescence
Source: PubMed Central journal article supplement — Sci Adv. 2020 Feb 28;6(9):eaay8541. doi: 10.1126/sciadv.aay8541 (PMC7048428; doi:10.1126/sciadv.aay8541), 2020-02-28
Supplement: aay8541_SM.pdf [file aay8541_SM.pdf]

## Supplementary Materials for

### Molecular defect-containing bilayer graphene exhibiting brightened luminescence

Xin-Jing Zhao, Hao Hou, Peng-Peng Ding, Ze-Ying Deng, Yang-Yang Ju, Shun-He Liu,  
Yu-Min Liu, Chun Tang, Liu-Bin Feng, Yuan-Zhi Tan\*

\*Corresponding author. Email: yuanzhi\_tan@xmu.edu.cn

Published 28 February 2020, *Sci. Adv.* **6**, eaay8541 (2020)  
DOI: 10.1126/sciadv.aay8541

#### This PDF file includes:

- Fig. S1.  $^1\text{H}$  NMR spectrum of polyphenylene precursor.
- Fig. S2.  $^{13}\text{C}$  NMR spectrum of polyphenylene precursor.
- Fig. S3. Bent structure of **1**.
- Fig. S4.  $^1\text{H}$  NMR spectrum of **1** in  $\text{C}_2\text{D}_2\text{Cl}_4$ .
- Fig. S5.  $^{13}\text{C}$  NMR spectrum of **1** in  $\text{C}_2\text{D}_2\text{Cl}_4/\text{CS}_2$ .
- Fig. S6.  $^1\text{H}$ - $^1\text{H}$  COSY spectrum of **1** in  $\text{C}_2\text{D}_2\text{Cl}_4$ .
- Fig. S7.  $^{13}\text{C}$ - $^1\text{H}$  COSY spectrum of **1** in  $\text{C}_2\text{D}_2\text{Cl}_4$ .
- Fig. S8.  $\text{H}\cdots\text{H}$  proximity in **1**.
- Fig. S9.  $^1\text{H}$  NMR spectra of **1** in  $\text{C}_2\text{D}_2\text{Cl}_4$  at different concentrations.
- Fig. S10.  $^1\text{H}$  NMR spectra of **1** in  $\text{C}_2\text{D}_2\text{Cl}_4$  at different temperatures.
- Fig. S11. Structure of **1** (left) and **2** (right).
- Fig. S12. Time-resolved fluorescence spectrum of **1**.
- Table S1. Ultraviolet-visible absorption parameters of **1** and **2**.

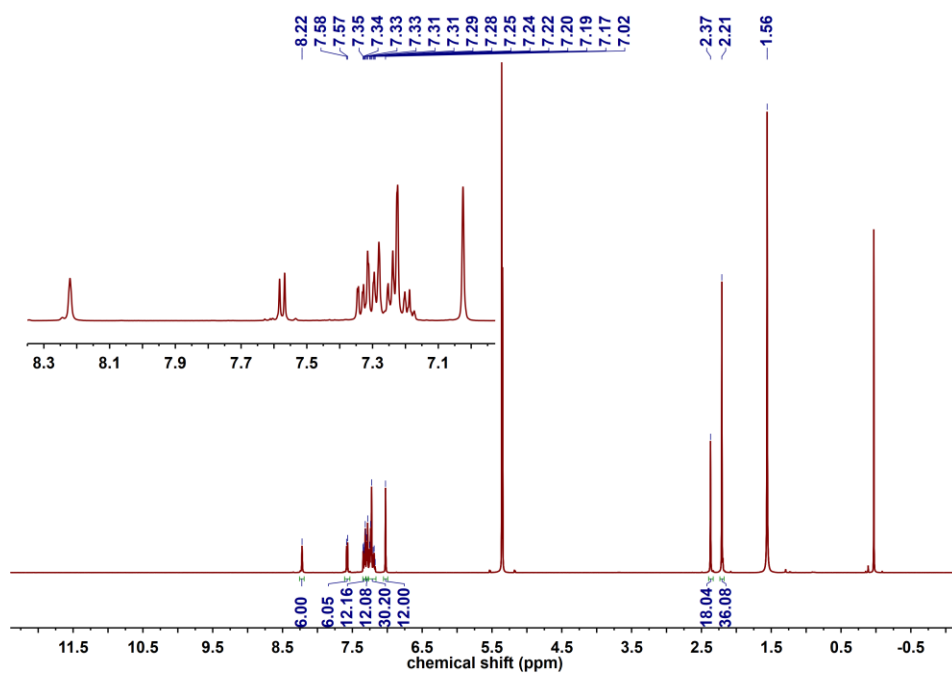

**Fig. S1.**  $^1\text{H}$  NMR spectrum of polyphenylene precursor. (600 MHz,  $\text{CD}_2\text{Cl}_2$ ):  $\delta =$  8.22 (s, 6H), 7.58 (d, 6H), 7.35-7.31 (m, 12H), 7.29-7.28 (m, 12H), 7.25-7.17 (m, 30H), 7.02 (s, 12H), 2.37 (s, 18H), 2.21 (s, 36H) ppm.

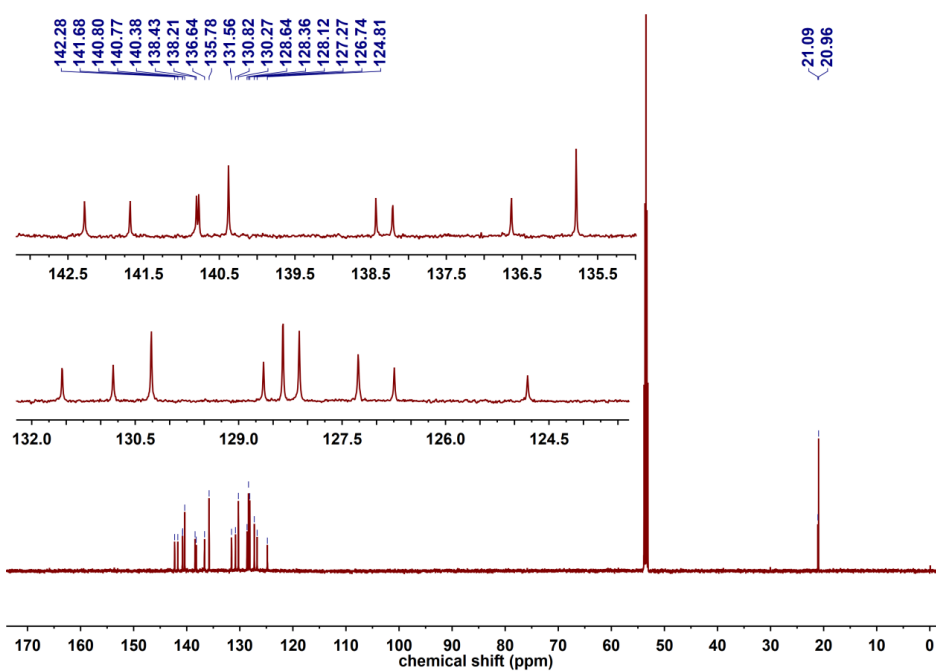

**Fig. S2.**  $^{13}\text{C}$  NMR spectrum of polyphenylene precursor. (150 MHz,  $\text{CD}_2\text{Cl}_2/\text{CS}_2$ ):  $\delta =$  142.28, 141.68, 140.80, 140.77, 140.38, 138.43, 138.21, 136.64, 135.78, 131.56, 130.82, 130.27, 128.64, 128.36, 128.12, 127.27, 126.74, 124.81, 21.09, 20.96 ppm.

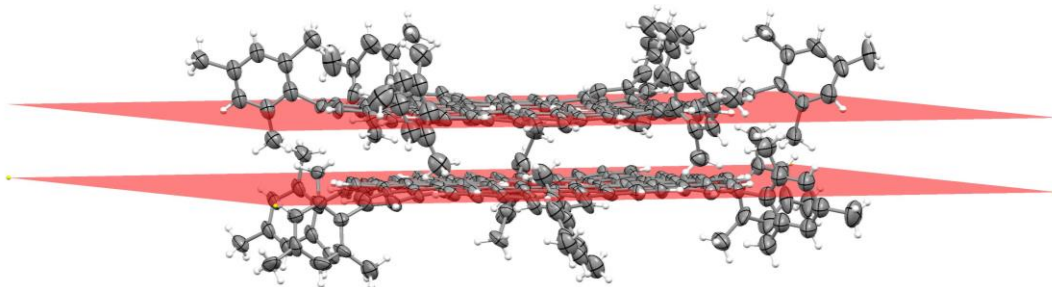

**Fig. S3. Bent structure of 1.** As shown the mesityl groups were bent outward the planar of inner aromatic core (shown in red) by a mean distance of 2.0 Å.

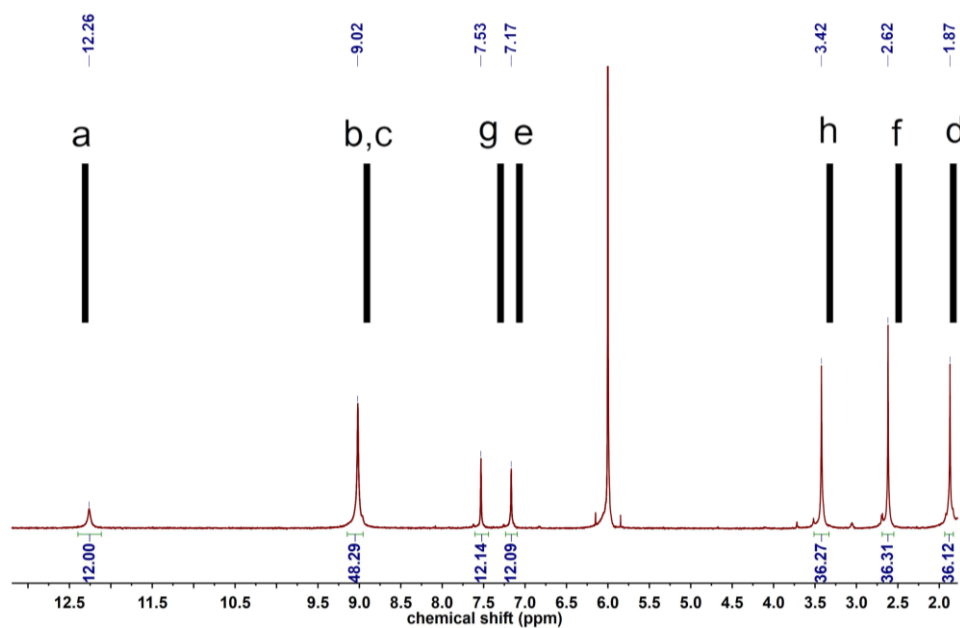

**Fig. S4.  $^1\text{H}$  NMR spectrum of 1 in  $\text{C}_2\text{D}_2\text{Cl}_4$ .**  $^1\text{H}$  NMR of compound **1**. (600 MHz,  $\text{C}_2\text{D}_2\text{Cl}_4$ ):  $\delta = 12.26$  (s, 12H), 9.02 (s, 48H), 7.53 (s, 12H), 7.17 (s, 12H), 3.42 (s, 36H), 2.62 (s, 36H), 1.87 (s, 36H) ppm. The theoretic NMR spectrum of **1** was calculated using the GAUSSIAN 16 program package, represented as black lines. The B3LYP functional and the 6-31G\* basis sets were employed. The calculated  $^1\text{H}$  NMR spectrum of **1** is in good agreement with the experimental patterns.

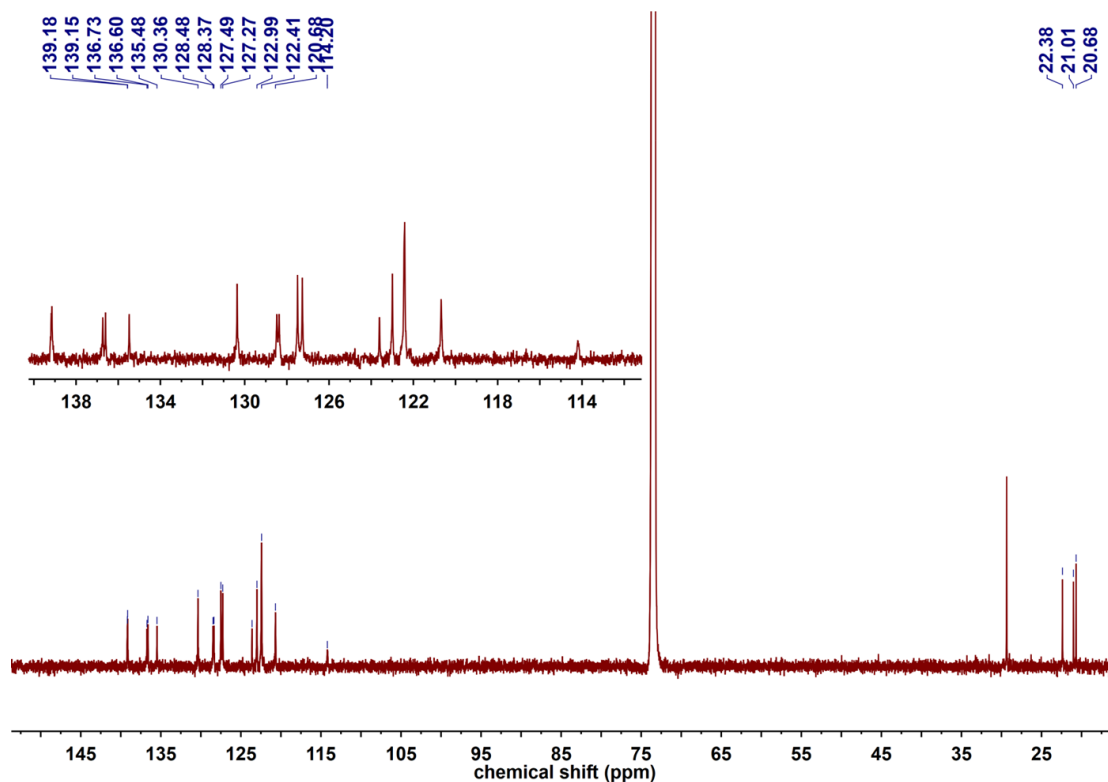

**Fig. S5.**  $^{13}\text{C}$  NMR spectrum of **1** in  $\text{C}_2\text{D}_2\text{Cl}_4/\text{CS}_2$ . (150 MHz,  $\text{C}_2\text{D}_2\text{Cl}_4/\text{CS}_2$ ):  $\delta =$  139.18, 139.15, 136.73, 136.60, 135.48, 130.36, 128.48, 128.37, 127.49, 127.27, 123.61, 122.99, 122.41, 120.68, 114.20, 22.38, 21.01, 20.68 ppm. We could see each methyl of mesityl group is chemically inequivalent, which clearly demonstrates the bilayer structure of **1**. The peaks at 29.5 ppm is assigned to the signal of hexane. According to asymmetric unit of **1**, there should be 17 peaks in the aromatic range, however, only 15 peaks were observed, due to the overlap of signals.

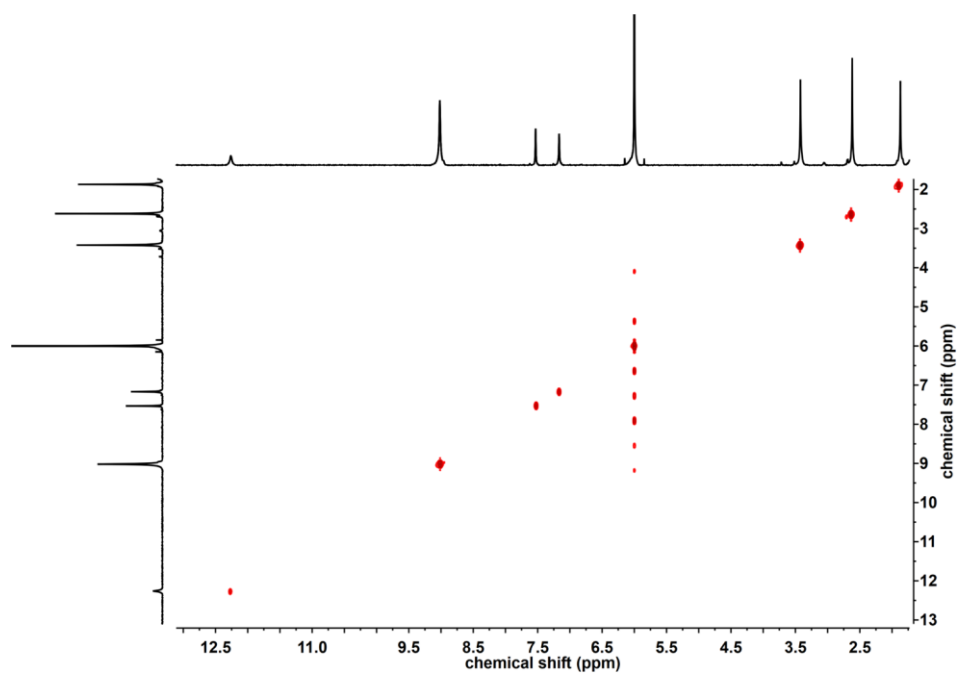

**Fig. S6.**  $^1\text{H}$ - $^1\text{H}$  COSY spectrum of **1** in  $\text{C}_2\text{D}_2\text{Cl}_4$ .

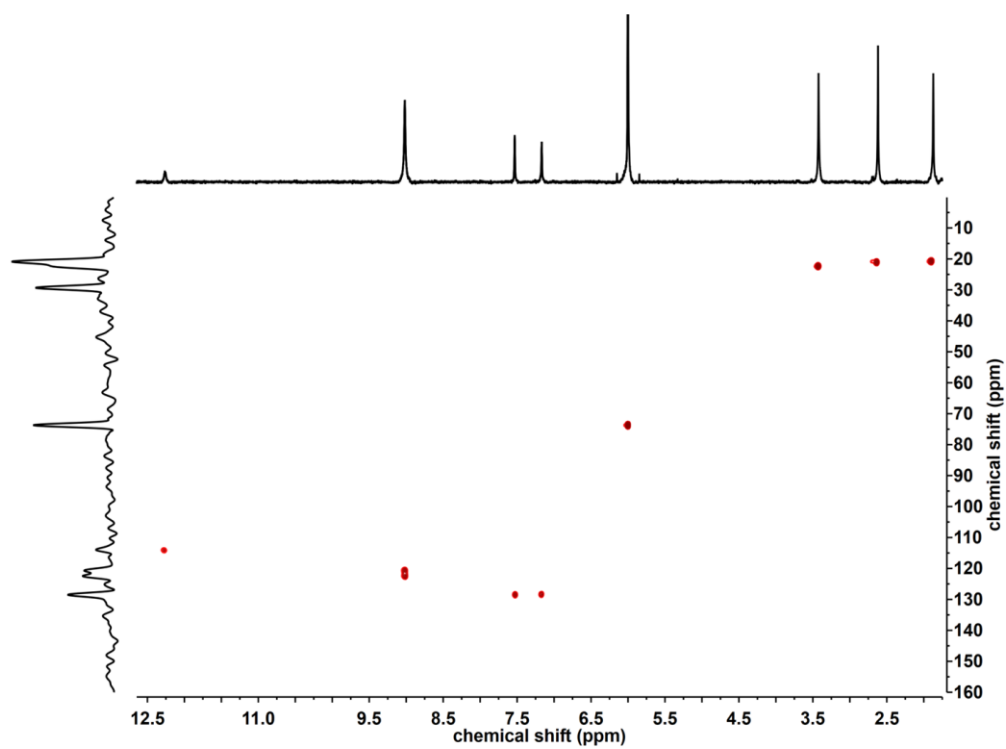

**Fig. S7.**  $^{13}\text{C}$ - $^1\text{H}$  COSY spectrum of **1** in  $\text{C}_2\text{D}_2\text{Cl}_4$ . As shown, three methyl groups of mesityl are inequivalent.

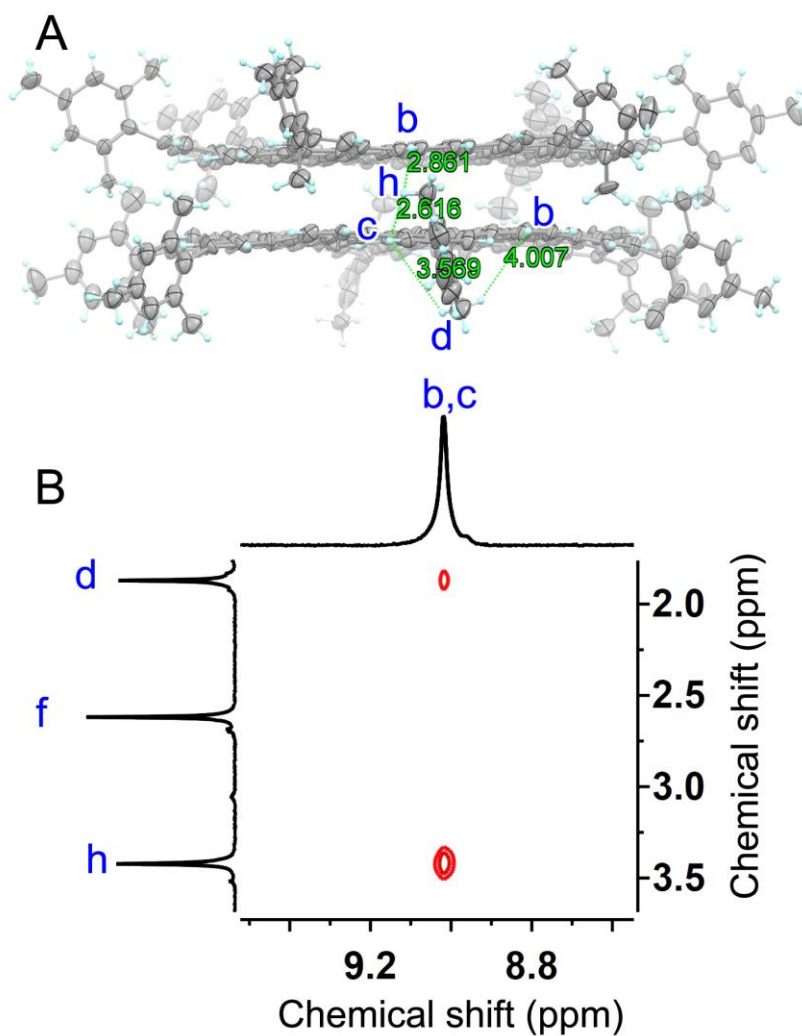

**Fig. S8. H...H proximity in 1.** (A), Typical H...H proximity between hydrogens of methyl at the mesityl groups and hydrogens at the periphery of inner core found in **1**. The interlayer and intralayer H...H proximity are represented as green dashed lines. (B), Expanded 2D NOESY of **1**, showing the protons coupling.

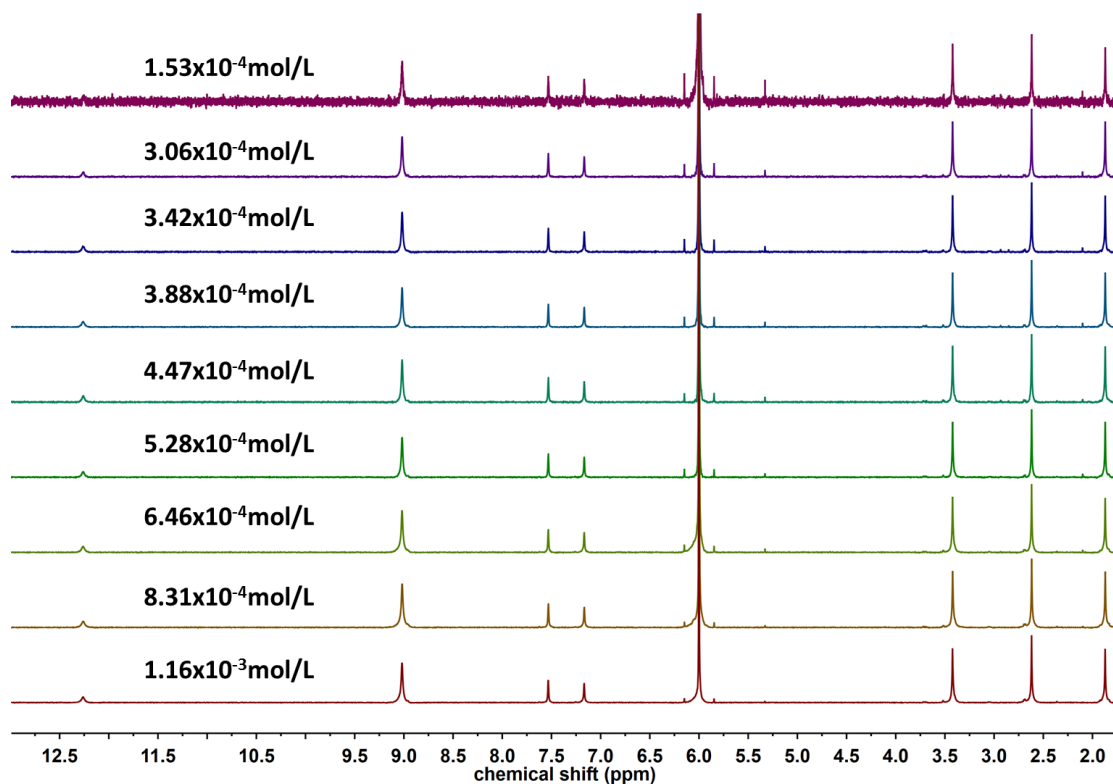

**Fig. S9.**  $^1\text{H}$  NMR spectra of 1 in  $\text{C}_2\text{D}_2\text{Cl}_4$  at different concentrations.

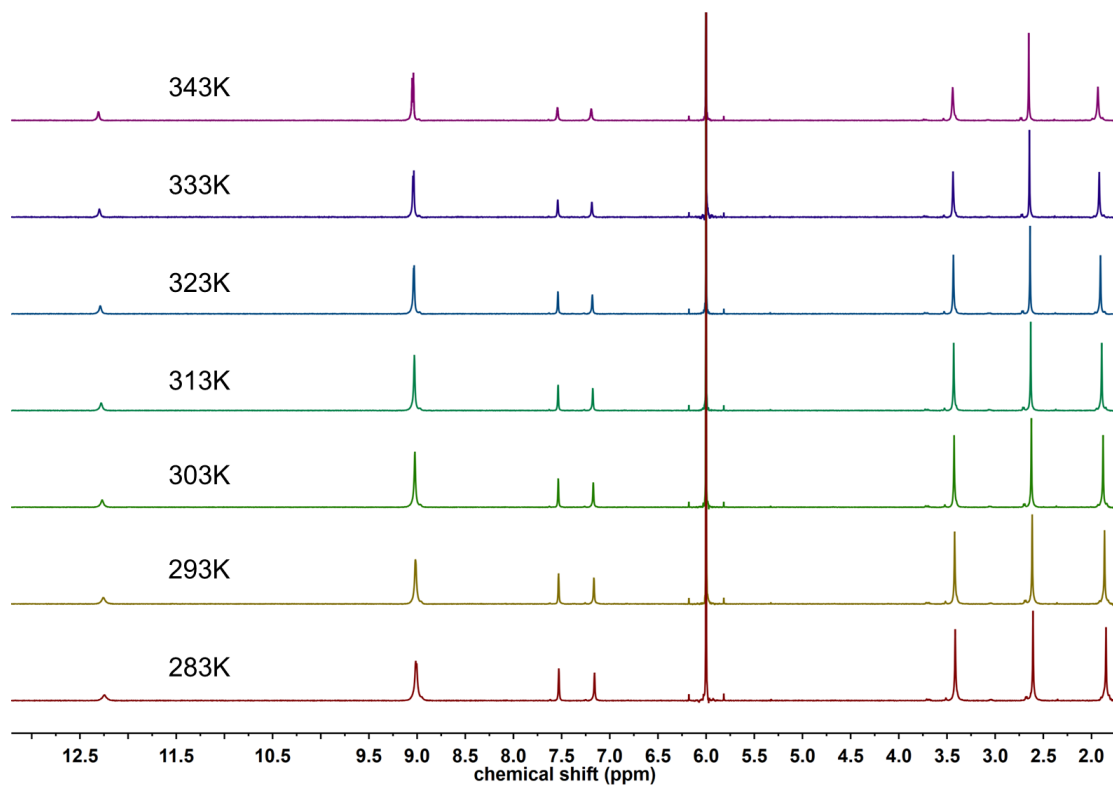

**Fig. S10.**  $^1\text{H}$  NMR spectra of 1 in  $\text{C}_2\text{D}_2\text{Cl}_4$  at different temperatures.

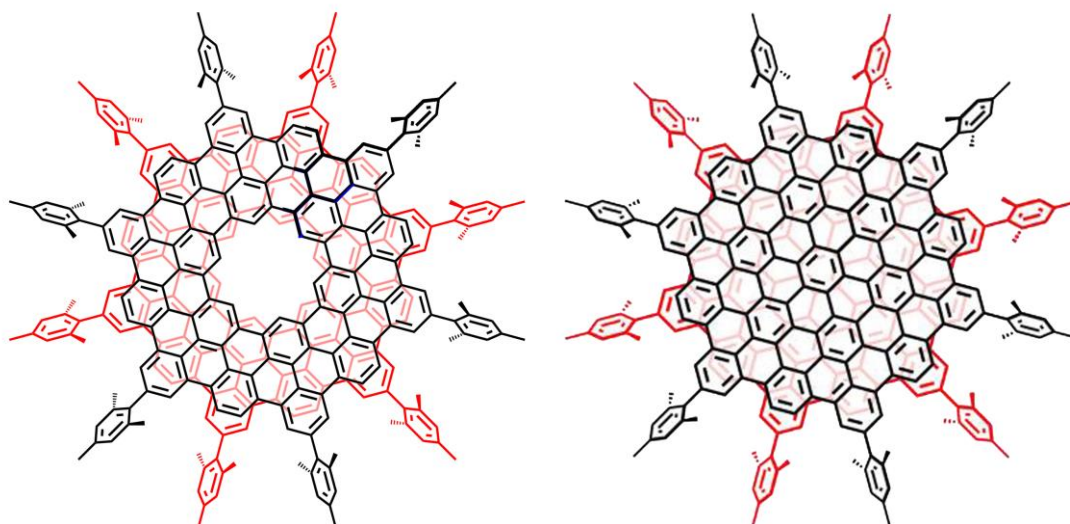

**Fig. S11. Structure of 1 (left) and 2 (right).**

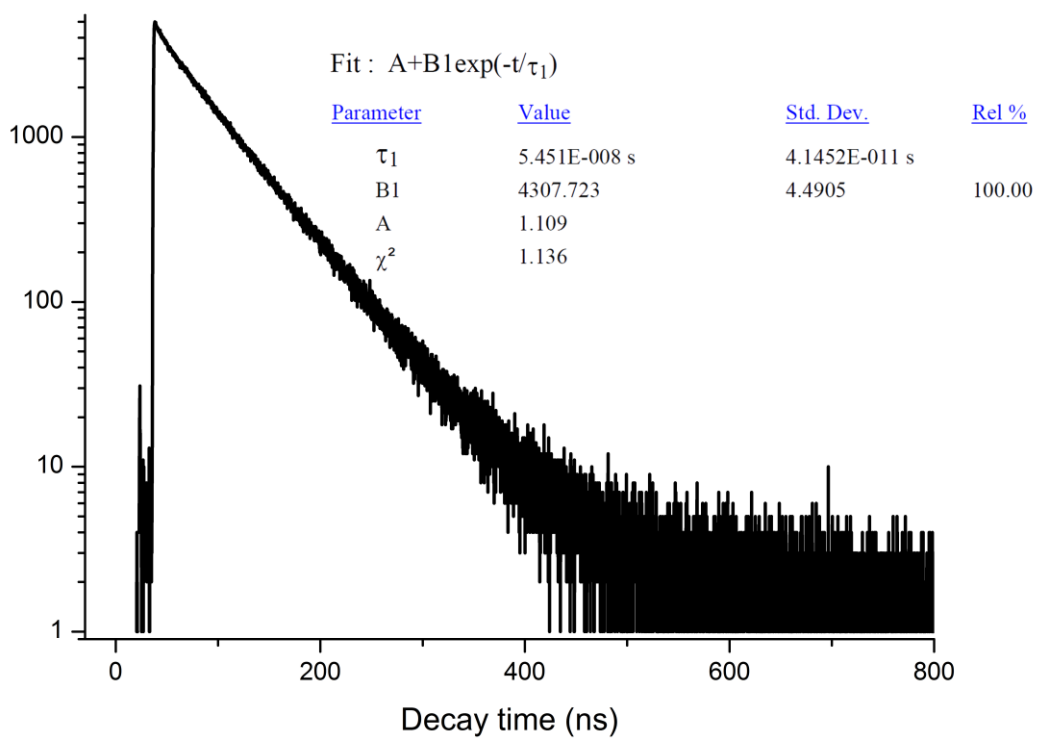

**Fig. S12. Time-resolved fluorescence spectrum of 1.** The TRPL spectrum was acquired and monitored at 512 nm in a dichloromethane solution.



**Table S1. Ultraviolet-visible absorption parameters of 1 and 2.**

| Compound | $\alpha$ band       | p band              | $\beta$ band        | Optical gap <sup>a</sup> |
|----------|---------------------|---------------------|---------------------|--------------------------|
| <b>1</b> | 496 nm<br>(2.50 eV) | 454 nm<br>(2.73 eV) | 421 nm<br>(2.94 eV) | 2.50 eV                  |
| <b>2</b> | 644 nm<br>(1.93 eV) | 588 nm<br>(2.11 eV) | 539 nm<br>(2.30 eV) | 1.93 eV                  |

a. The optical gap was calculated based on the  $\alpha$  band of the spectra.
